# Supplementary material
Source: PubMed Central journal article supplement (PMC4363434)
Supplement: IAI.02701-14_zii999091158so1.pdf [file IAI.02701-14_zii999091158so1.pdf]

## Supplementary Figure S1

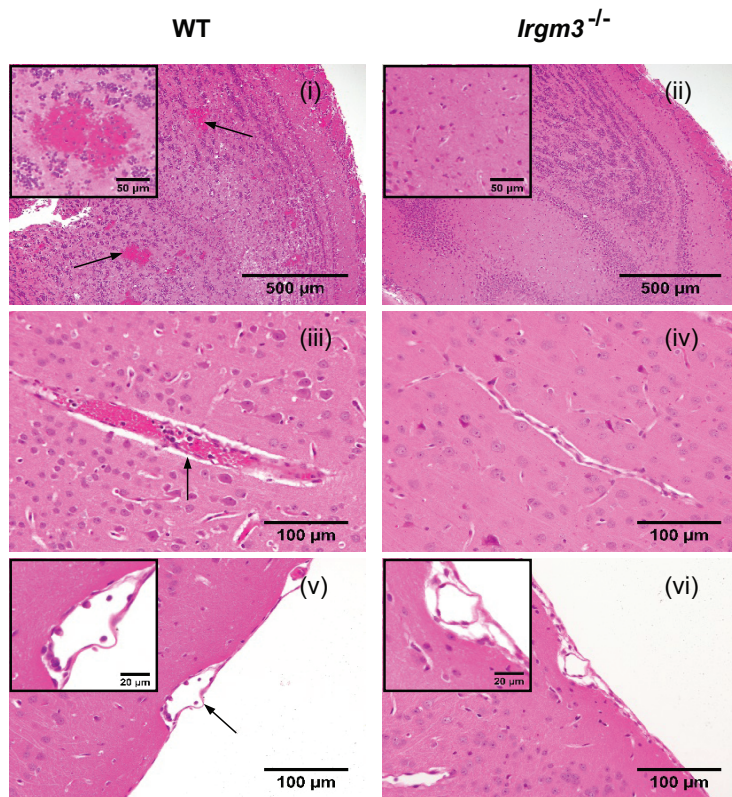

**Figure S1. Brain histology in PbA-infected *Irgm3*<sup>-/-</sup> and WT mice.** Representative histological H&E stained sections from brains of WT (i,iii,v) and *Irgm3*<sup>-/-</sup> (ii,iv,vi) mice on day 7 p.i. are shown. Pial and parenchymal vessels containing parasitized erythrocytes and leukocytes, as well as areas of hemorrhage, are indicated by black arrows.
