# Supplementary material
Source: PubMed Central journal article supplement (PMC4363434)
Supplement: IAI.02701-14_zii999091158so2.pdf [file IAI.02701-14_zii999091158so2.pdf]

## Supplementary Figure S2

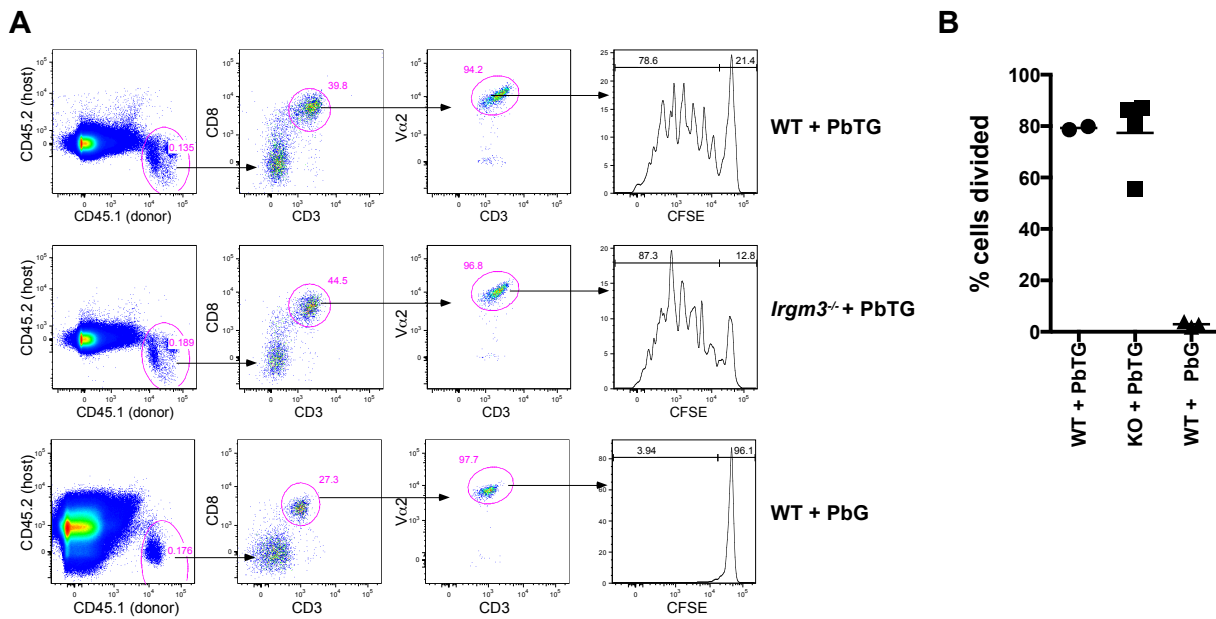

**Figure S2. *Irgm3* deficiency does not affect CD8<sup>+</sup> T-cell proliferation.** CFSE-labelled, Ptpcrca-OT-I splenocytes were adoptively transferred into WT or *Irgm3*<sup>-/-</sup> recipient mice. The mice were infected 24 h later with  $1 \times 10^6$  PbTG or PbG parasitised RBC. On day 3 p.i., splenocytes from the infected recipient mice were analyzed by flow cytometry. **(A)** Ptpcrca-OT-I CD8<sup>+</sup> T-cells were analyzed for CFSE dye dilution. Data from representative samples are shown. **(B)** The percentage of divided Ptpcrca-OT-I CD8<sup>+</sup> T-cells is shown for each group. Data are from a single experiment with  $n = 2 - 4$  / group.
