# Supplementary material
Source: PubMed Central journal article supplement (PMC4363434)
Supplement: IAI.02701-14_zii999091158so3.pdf [file IAI.02701-14_zii999091158so3.pdf]

## Supplementary Figure S3

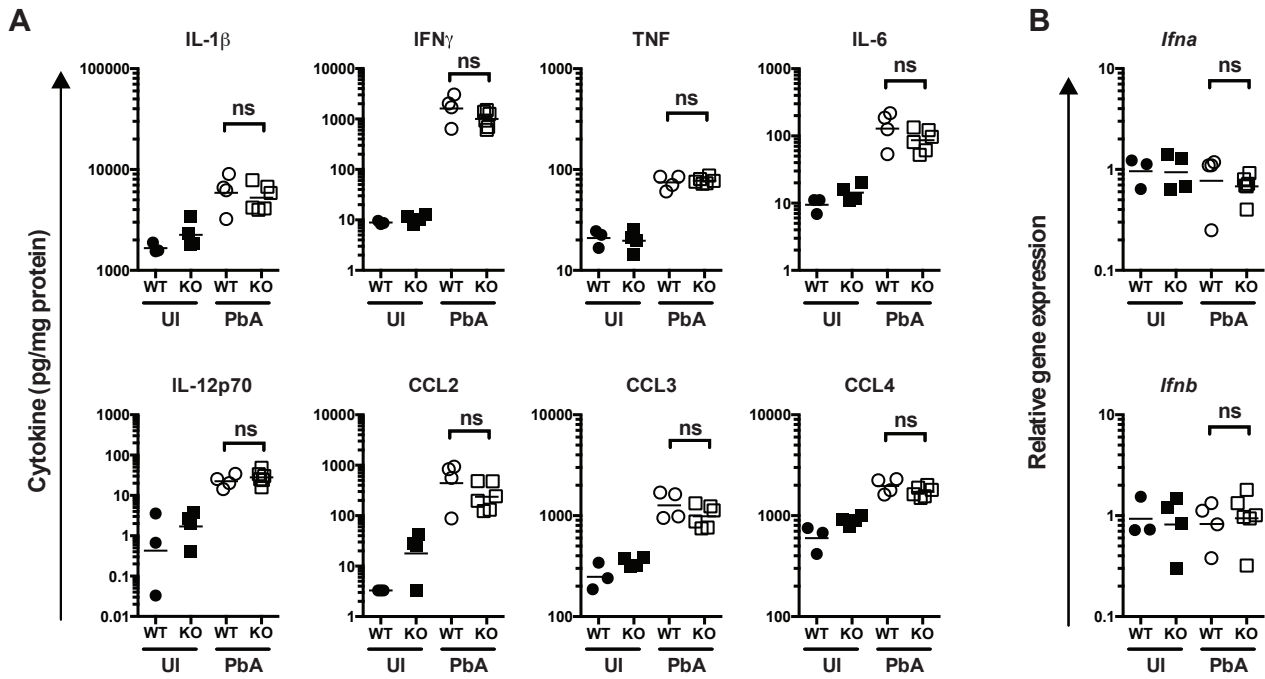

**Figure S3. Effect of *Irgm3* deficiency on spleen cytokine levels on day 3 p.i.** WT or *Irgm3*<sup>-/-</sup> (KO) mice were infected with PbA on day 0. On day 3 p.i., groups of uninfected (UI) and PbA-infected mice were euthanized and cytokine protein (**A**) or mRNA (**B**) were quantified. (**A**) Levels of the indicated cytokines/chemokines were measured by cytometric bead array and normalized to total protein concentration within the homogenate. (**B**) Relative levels of the indicated cytokine genes were determined by RT-qPCR. Data are from a single experiment. Statistical significance was determined using ANOVA with Tukey's post-test. Symbols represent individual mice, and horizontal bars are the geometric mean of groups. n.s., p>0.05.
