# Supplementary material
Source: PubMed Central journal article supplement (PMC4363434)
Supplement: IAI.02701-14_zii999091158so4.pdf [file IAI.02701-14_zii999091158so4.pdf]

## Supplementary Figure S4

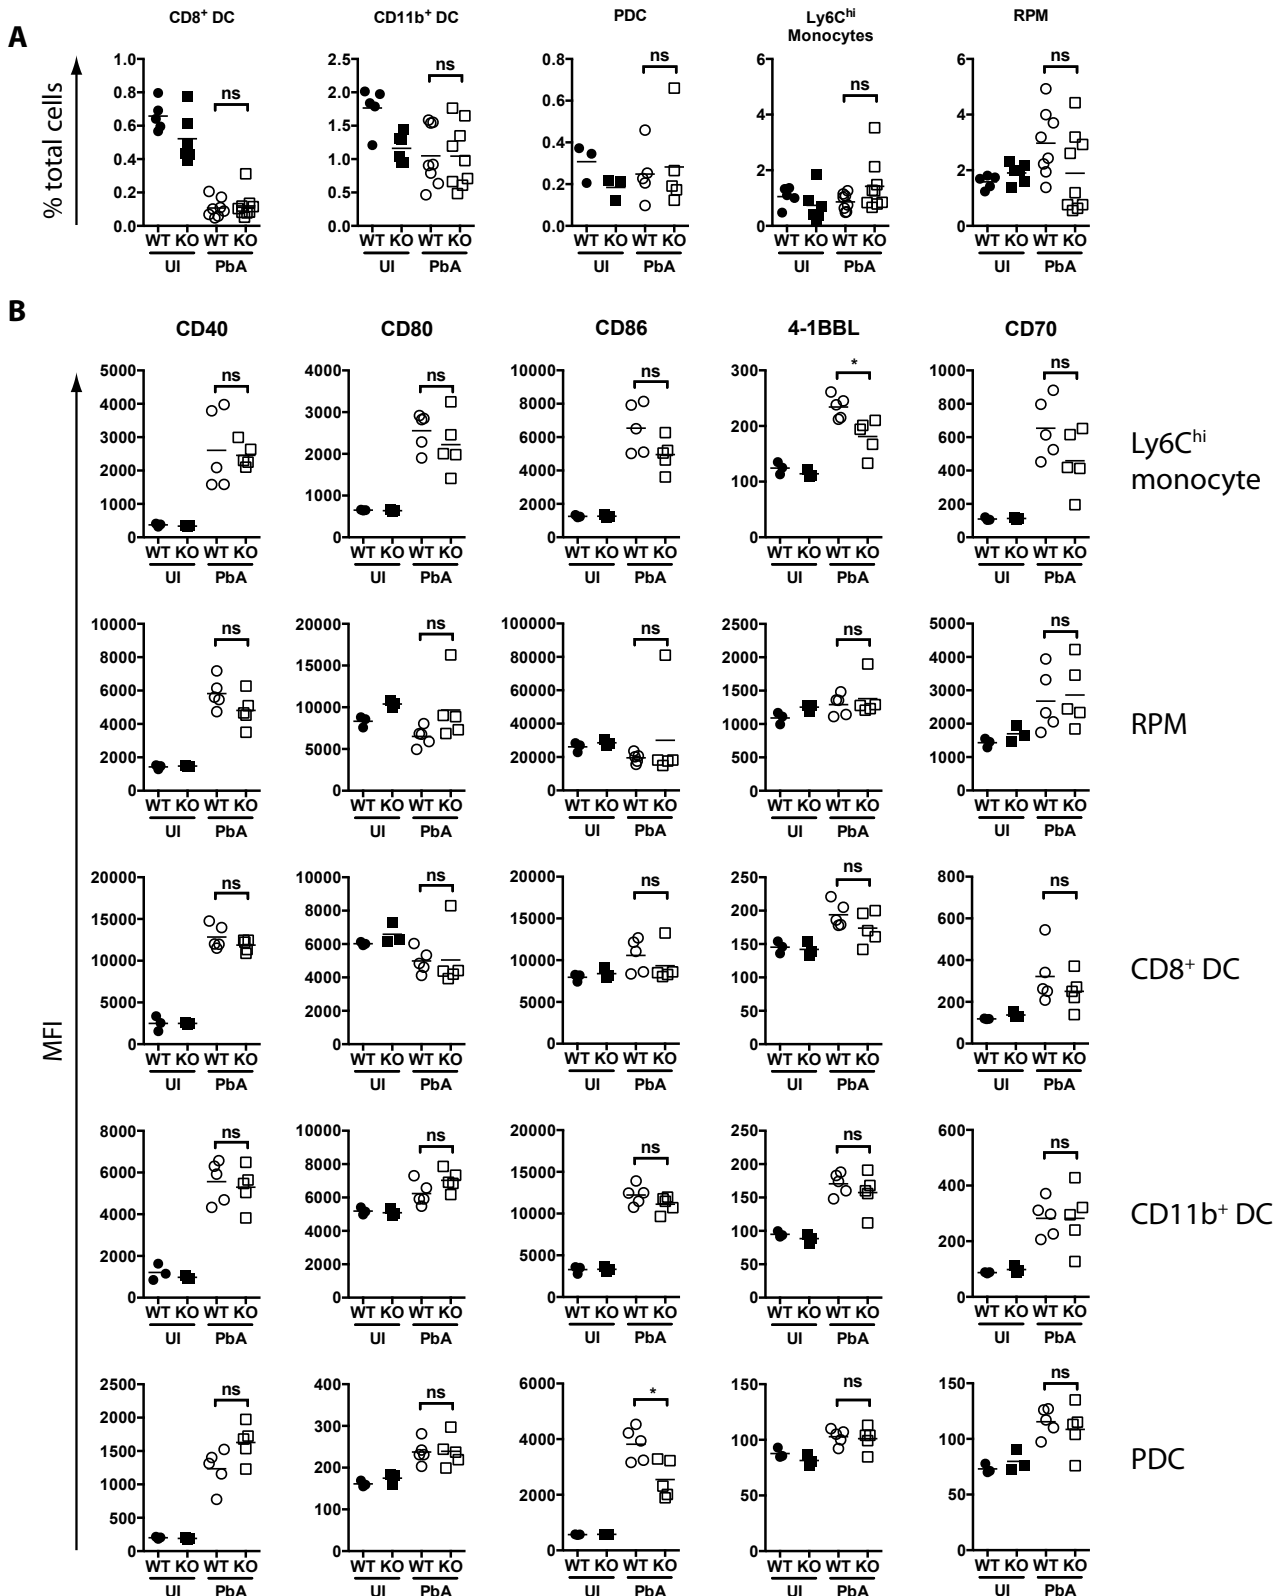

**Figure S4. Effect of *Irgm3* deficiency on co-stimulatory molecule expression by spleen myeloid cells.**

WT or *Irgm3*<sup>-/-</sup> (KO) mice were infected with PbA on day 0. On day 4 p.i., groups of uninfected (UI) and PbA-infected mice were euthanized and the proportion of indicated populations with respect to total nucleated cells (**A**) or expression of co-stimulatory molecules (**B**) was determined by flow cytometry. Splenic myeloid subsets were identified as follows: CD8<sup>+</sup> DC (Lin<sup>-</sup>, AF<sup>lo</sup>, CD11c<sup>hi</sup>, CD11b<sup>-</sup>, CD8<sup>+</sup>); CD11b<sup>+</sup> DC (Lin<sup>-</sup>, AF<sup>lo</sup>, CD11c<sup>hi</sup>, CD11b<sup>+</sup>, CD8<sup>-</sup>); PDC (Lin<sup>-</sup>, AF<sup>lo</sup>, CD11c<sup>int</sup>, CD11b<sup>-</sup>, B220<sup>+</sup>, Ly6C<sup>+</sup>, Siglec-h<sup>+</sup>); Ly6C<sup>hi</sup> monocytes (Lin<sup>-</sup>, AF<sup>lo</sup>, CD11b<sup>+</sup>, Ly6C<sup>hi</sup>, SSC<sup>lo</sup>); RPM (Lin<sup>-</sup>, AF<sup>hi</sup>, F4/80<sup>hi</sup>). Median fluorescence intensity (MFI) of the indicated markers is presented. Symbols represent individual mice and group means. Statistical significance was determined by ANOVA followed by Tukey's post-test. n.s., p>0.05., \*p<0.05.
